# Supplementary material for: Insoluble solids at high concentrations repress yeast’s response against stress and increase intracellular ROS levels
Source: Springer Nature journal article supplement (doi:10.1038/s41598-019-48733-w), 2019-08-22
Supplement: MOESM1 [file 41598_2019_48733_MOESM1_ESM.pdf]

## **Insoluble solids at high concentrations repress yeast's response against stress and increase intracellular ROS levels**

**Antonio D. Moreno<sup>1\*</sup>, Cristina González-Fernández<sup>2</sup>, Mercedes Ballesteros<sup>1,2</sup>, Elia Tomás-Pejó<sup>2</sup>**

<sup>1</sup> CIEMAT, Department of Energy, Biofuels Unit, 28040 Madrid, Spain

<sup>2</sup> IMDEA Energy Institute, Biotechnological Processes for Energy Production Unit, 28935 Móstoles, Spain.

\*Correspondence to: Antonio D. Moreno, CIEMAT, Department of Energy, Biofuels Unit, Avda. Complutense 40, 28040 Madrid, Spain. Phone: +34 91 346 6054. E-mail: david.moreno@ciemat.es

## Supplementary Table S1

**Table S1. Upregulated and downregulated genes with molecular function unknown**

| <b>Gene<br/>(Systematic name)</b> | <b>Brief description</b>                                                                                                                                              | <b>Log2-fold<br/>change</b> |
|-----------------------------------|-----------------------------------------------------------------------------------------------------------------------------------------------------------------------|-----------------------------|
| <b>Upregulated genes:</b>         |                                                                                                                                                                       |                             |
| <b>ECM1</b>                       | Pre-ribosomal factor involved in 60S ribosomal protein subunit export                                                                                                 | <b>0.9</b>                  |
| <b>SEO1</b>                       | Putative permease                                                                                                                                                     | <b>1.5</b>                  |
| <b>YBL028C</b>                    | Protein of unknown function that may interact with ribosomes                                                                                                          | <b>0.7</b>                  |
| <b>PAU9</b>                       | Protein of unknown function                                                                                                                                           | <b>1.9</b>                  |
| <b>MIC10</b>                      | Conserved component of the MICOS complex                                                                                                                              | <b>0.8</b>                  |
| <b>YCR051W</b>                    | Putative protein of unknown function; non-essential gene                                                                                                              | <b>1.0</b>                  |
| <b>YDL012C</b>                    | Tail-anchored plasma membrane protein with a conserved CYSTM module; possibly involved in response to stress                                                          | <b>0.7</b>                  |
| <b>KNH1</b>                       | Protein with similarity to Kre9p; required for propionic acid resistance                                                                                              | <b>1.1</b>                  |
| <b>RAD59</b>                      | Protein involved DNA double-strand break repair; repairs breaks in DNA during vegetative growth via recombination and single-strand annealing                         | <b>1.1</b>                  |
| <b>YDL121C</b>                    | Putative protein of unknown function; non-essential gene                                                                                                              | <b>0.8</b>                  |
| <b>YDR034C-A</b>                  | Putative protein of unknown function                                                                                                                                  | <b>1.9</b>                  |
| <b>BCP1</b>                       | Essential protein involved in nuclear export of Mss4p, which plays a role in actin cytoskeleton organization and vesicular transport                                  | <b>1.2</b>                  |
| <b>IRC22</b>                      | Protein of unknown function; non-essential gene                                                                                                                       | <b>0.7</b>                  |
| <b>GTT3</b>                       | Protein of unknown function may be involved in glutathione metabolism                                                                                                 | <b>0.6</b>                  |
| <b>SCC4</b>                       | Subunit of cohesin loading factor (Scc2p-Scc4p); involved in establishing sister chromatid cohesion during double-strand break repair via phosphorylated histone H2AX | <b>1.1</b>                  |
| <b>YER156C</b>                    | Putative protein of unknown function; expression is copper responsive and downregulated in strains deleted for MAC1, a copper-responsive transcription factor         | <b>0.9</b>                  |
| <b>FMP10</b>                      | Putative protein of unknown function                                                                                                                                  | <b>0.8</b>                  |
| <b>YER186C</b>                    | Putative protein of unknown function                                                                                                                                  | <b>1.0</b>                  |
| <b>YFR035C</b>                    | Putative protein of unknown function                                                                                                                                  | <b>1.1</b>                  |
| <b>YGL101W</b>                    | Protein of unknown function; non-essential gene                                                                                                                       | <b>0.9</b>                  |
| <b>MTO1</b>                       | Mitochondrial protein                                                                                                                                                 | <b>1.0</b>                  |

|                  |                                                                                                                                                                                                                                                                                                       |            |
|------------------|-------------------------------------------------------------------------------------------------------------------------------------------------------------------------------------------------------------------------------------------------------------------------------------------------------|------------|
| <b>VHT1</b>      | High-affinity plasma membrane H <sup>+</sup> -biotin (vitamin H) symporter                                                                                                                                                                                                                            | <b>0.8</b> |
| <b>YGR125W</b>   | Putative protein of unknown function                                                                                                                                                                                                                                                                  | <b>0.6</b> |
| <b>BNS1</b>      | Protein of unknown function                                                                                                                                                                                                                                                                           | <b>1.2</b> |
| <b>YGR266W</b>   | Protein of unknown function; protein abundance increases in response to DNA replication stress                                                                                                                                                                                                        | <b>1.2</b> |
| <b>CIA2</b>      | Component of cytosolic iron-sulfur protein assembly (CIA) machinery; forms the CIA targeting complex with Cia1p and Met18p that directs Fe-S cluster incorporation into a subset of proteins involved in methionine biosynthesis, DNA replication and repair, transcription, and telomere maintenance | <b>1.1</b> |
| <b>AXL2</b>      | Integral plasma membrane protein; required for axial budding in haploid cells                                                                                                                                                                                                                         | <b>0.8</b> |
| <b>AIM20</b>     | Protein of unknown function; overexpression causes cell cycle delay or arrest                                                                                                                                                                                                                         | <b>0.9</b> |
| <b>YJL047C-A</b> | Putative protein of unknown function                                                                                                                                                                                                                                                                  | <b>1.1</b> |
| <b>ALB1</b>      | Shuttling pre-60S factor; involved in the biogenesis of ribosomal large subunit                                                                                                                                                                                                                       | <b>0.8</b> |
| <b>CYC1</b>      | Cytochrome c, isoform 1; electron carrier of mitochondrial intermembrane space that transfers electrons from ubiquinone-cytochrome c oxidoreductase to cytochrome c oxidase during cellular respiration                                                                                               | <b>2.7</b> |
| <b>YKL068W-A</b> | Putative protein of unknown function                                                                                                                                                                                                                                                                  | <b>1.8</b> |
| <b>DPH2</b>      | Protein required for synthesis of diphthamide                                                                                                                                                                                                                                                         | <b>1.1</b> |
| <b>SRP40</b>     | Nucleolar serine-rich protein; role in preribosome assembly or transport; may function as a chaperone of small nucleolar ribonucleoprotein particles (snoRNPs)                                                                                                                                        | <b>1.0</b> |
| <b>PTR2</b>      | Integral membrane peptide transporter; mediates transport of di- and tri-peptides                                                                                                                                                                                                                     | <b>1.6</b> |
| <b>MIM2</b>      | Mitochondrial protein required for outer membrane protein import                                                                                                                                                                                                                                      | <b>1.1</b> |
| <b>YML018C</b>   | Protein of unknown function; non-essential gene                                                                                                                                                                                                                                                       | <b>0.9</b> |
| <b>SUR7</b>      | Plasma membrane protein, component of eisosomes                                                                                                                                                                                                                                                       | <b>1.5</b> |
| <b>MIX17</b>     | Mitochondrial intermembrane space protein; required for normal oxygen consumption; protein abundance increases in response to DNA replication stress                                                                                                                                                  | <b>0.8</b> |
| <b>AIM34</b>     | Protein of unknown function                                                                                                                                                                                                                                                                           | <b>1.5</b> |
| <b>FMP42</b>     | Putative protein of unknown function                                                                                                                                                                                                                                                                  | <b>1.0</b> |
| <b>YNL095C</b>   | Putative protein of unknown function; non-essential gene                                                                                                                                                                                                                                              | <b>1.6</b> |
| <b>CWC25</b>     | Splicing factor required for the first step of pre-mRNA splicing; heat-stable protein                                                                                                                                                                                                                 | <b>0.8</b> |
| <b>YOL014W</b>   | Putative protein of unknown function                                                                                                                                                                                                                                                                  | <b>1.3</b> |
| <b>YOL019W</b>   | Protein of unknown function                                                                                                                                                                                                                                                                           | <b>0.8</b> |

|                             |                                                                                                                                                                                                               |             |
|-----------------------------|---------------------------------------------------------------------------------------------------------------------------------------------------------------------------------------------------------------|-------------|
| <b>ZEO1</b>                 | Peripheral membrane protein of the plasma membrane; regulates the cell integrity pathway mediated by Pkc1p and Slp2p                                                                                          | <b>0.8</b>  |
| <b>CYT1</b>                 | Cytochrome c1; component of the mitochondrial respiratory chain                                                                                                                                               | <b>1.4</b>  |
| <b>YOR072W-B</b>            | Putative protein of unknown function                                                                                                                                                                          | <b>1.7</b>  |
| <b>YTM1</b>                 | Constituent of 66S pre-ribosomal particles; required for maturation of the large ribosomal subunit                                                                                                            | <b>1.0</b>  |
| <b>SFG1</b>                 | Nuclear protein putative transcription factor; required for growth of superficial pseudohyphae but not for invasive pseudohyphal growth                                                                       | <b>1.1</b>  |
| <b>CIR2</b>                 | Putative ortholog of human ETF-dH; may have a role in oxidative stress response                                                                                                                               | <b>1.9</b>  |
| <b>TYW1</b>                 | Iron-sulfur protein required for synthesis of Wybutosine modified tRNA; induction by Yap5p in response to iron provides protection from high iron toxicity; overexpression results in increased cellular iron | <b>0.8</b>  |
| <b>NIP7</b>                 | Nucleolar protein required for 60S ribosome subunit biogenesis                                                                                                                                                | <b>1.0</b>  |
| <b>Downregulated genes:</b> |                                                                                                                                                                                                               |             |
| <b>MAK16</b>                | Essential nuclear protein; maintenance of killer                                                                                                                                                              | <b>-1.0</b> |
| <b>FRT2</b>                 | Tail-anchored ER membrane protein of unknown function; functionally related to TCP1                                                                                                                           | <b>-2.0</b> |
| <b>FUN19</b>                | Non-essential protein of unknown function; expression induced in response to heat stress                                                                                                                      | <b>-1.1</b> |
| <b>YAR023C</b>              | Putative integral membrane protein                                                                                                                                                                            | <b>-1.1</b> |
| <b>YAR029W</b>              | Member of DUP240 gene family but contains no transmembrane domains (protein localized to the cytoplasm)                                                                                                       | <b>-1.0</b> |
| <b>MOH1</b>                 | Protein of unknown function, essential for stationary phase survival                                                                                                                                          | <b>-1.6</b> |
| <b>YBL111C</b>              | Helicase-like protein encoded within the telomeric Y' element; relocalizes from mitochondrion to cytoplasm upon DNA replication stress                                                                        | <b>-1.3</b> |
| <b>YRO2</b>                 | Protein with a putative role in response to acid stress (protein localized to the mitochondrion and detected in plasma membrane in the presence of acetic acid)                                               | <b>-2.6</b> |
| <b>YBR085C-A</b>            | Protein of unknown function                                                                                                                                                                                   | <b>-1.0</b> |
| <b>VID24</b>                | GID Complex regulatory subunit; vacuolar import and degradation                                                                                                                                               | <b>-0.8</b> |
| <b>AIM3</b>                 | Protein that inhibits barbed-end actin filament elongation; altered inheritance rate of mitochondria                                                                                                          | <b>-1.8</b> |
| <b>YBR138C</b>              | Cytoplasmic protein of unknown function                                                                                                                                                                       | <b>-2.2</b> |
| <b>YSW1</b>                 | Protein required for normal prospore membrane formation                                                                                                                                                       | <b>-1.3</b> |
| <b>SDS24</b>                | Protein involved in cell separation during budding                                                                                                                                                            | <b>-2.2</b> |
| <b>MTC4</b>                 | Cytoplasmic protein of unknown function                                                                                                                                                                       | <b>-1.7</b> |
| <b>YBR285W</b>              | Putative protein of unknown function                                                                                                                                                                          | <b>-1.2</b> |

|                |                                                                                                                                                                                                                                              |             |
|----------------|----------------------------------------------------------------------------------------------------------------------------------------------------------------------------------------------------------------------------------------------|-------------|
| <b>FUS1</b>    | Membrane protein localized to the shmoo tip that regulates the termination of mating projection growth; has a role in cortical protein anchoring                                                                                             | <b>-1.0</b> |
| <b>GID7</b>    | Subunit of GID Complex that binds directly to central component Vid30p                                                                                                                                                                       | <b>-0.9</b> |
| <b>HSP30</b>   | Negative regulator of the H(+)-ATPase Pma1p involved in the response to various stresses such as heat, osmotic stress, and DNA damage; also involved in negative regulation of ATPase activity                                               | <b>-2.0</b> |
| <b>GPM2</b>    | Homolog of Gpm1p phosphoglycerate mutase; may be non-functional                                                                                                                                                                              | <b>-2.3</b> |
| <b>USO1</b>    | Essential protein involved in vesicle-mediated ER to Golgi transport; binds membranes and functions during vesicle docking to the Golgi; required for assembly of the ER-to-Golgi SNARE complex                                              | <b>-2.5</b> |
| <b>PEX19</b>   | Chaperone and import receptor for newly-synthesized class I PMPs; binds peroxisomal membrane proteins (PMPs) in the cytoplasm and delivers them to the peroxisome for subsequent insertion into the peroxisomal membrane                     | <b>-1.2</b> |
| <b>BUG1</b>    | Cis-golgi localized protein involved in ER to Golgi transport; forms a complex with the mammalian GRASP65 homolog, Grh1p                                                                                                                     | <b>-1.2</b> |
| <b>MSS2</b>    | Peripherally bound inner membrane protein of the mitochondrial matrix; involved in membrane insertion of C-terminus of Cox2p                                                                                                                 | <b>-1.9</b> |
| <b>YDL109C</b> | Putative lipase; involved in lipid metabolism; non-essential gene                                                                                                                                                                            | <b>-1.4</b> |
| <b>IWR1</b>    | RNA polymerase II transport factor, conserved from yeast to humans; also has a role in transporting RNA polymerase III into the nucleus                                                                                                      | <b>-1.1</b> |
| <b>SAS10</b>   | Subunit of U3-containing Small Subunit (SSU) processome complex; involved in production of 18S rRNA and assembly of small ribosomal subunit; disrupts silencing when overproduced                                                            | <b>-1.5</b> |
| <b>MSH5</b>    | Protein of the MutS family; forms a dimer with Msh4p that facilitates crossovers between homologs during meiosis                                                                                                                             | <b>-1.1</b> |
| <b>RTN2</b>    | Reticulon protein; involved in nuclear pore assembly and maintenance of tubular ER morphology; promotes membrane curvature; regulates the ER asymmetry-induced inheritance block during ER stress; role in ER-derived peroxisomal biogenesis | <b>-1.5</b> |
| <b>FMP45</b>   | Integral membrane protein localized to mitochondria; required for sporulation and maintaining sphingolipid content                                                                                                                           | <b>-1.6</b> |
| <b>HBT1</b>    | Shmoo tip protein, substrate of Hub1p ubiquitin-like protein                                                                                                                                                                                 | <b>-1.2</b> |
| <b>ADY3</b>    | Protein required for spore wall formation; mediates assembly of the LEP complex, formation of the ring-like structure via interaction with spindle pole body components and prospore membrane maturation                                     | <b>-1.6</b> |
| <b>GAL3</b>    | Transcriptional regulator; involved in activation of the GAL genes in response to galactose                                                                                                                                                  | <b>-1.1</b> |
| <b>RAD61</b>   | Subunit of a complex that inhibits sister chromatid cohesion; also negatively regulates chromosome condensation                                                                                                                              | <b>-1.5</b> |
| <b>PST1</b>    | Cell wall protein that contains a putative GPI-attachment site; secreted by regenerating protoplasts; upregulated by cell wall damage via disruption of FKS1                                                                                 | <b>-1.1</b> |
| <b>YOS9</b>    | ER quality-control lectin; participates in efficient ER retention of misfolded proteins by recognizing them and delivering them to Hrd1p                                                                                                     | <b>-1.2</b> |

|                |                                                                                                                                                                                                                            |             |
|----------------|----------------------------------------------------------------------------------------------------------------------------------------------------------------------------------------------------------------------------|-------------|
| <b>RRG1</b>    | Protein of unknown function; required for vacuolar acidification and mitochondrial genome maintenance                                                                                                                      | <b>-1.3</b> |
| <b>DOS2</b>    | Protein of unknown function                                                                                                                                                                                                | <b>-1.7</b> |
| <b>SLU7</b>    | RNA splicing factor; required for ATP-independent portion of 2nd catalytic step of spliceosomal RNA splicing                                                                                                               | <b>-2.0</b> |
| <b>DOP1</b>    | Golgi-localized, leucine-zipper domain containing protein; involved in endosome to Golgi transport, organization of the ER, establishing cell polarity, and morphogenesis                                                  | <b>-0.6</b> |
| <b>VPS64</b>   | Protein required for cytoplasm to vacuole targeting of proteins                                                                                                                                                            | <b>-1.6</b> |
| <b>RAV2</b>    | Subunit of RAVE complex (Rav1p, Rav2p, Skp1p)                                                                                                                                                                              | <b>-0.9</b> |
| <b>DON1</b>    | Meiosis-specific component of the spindle pole body                                                                                                                                                                        | <b>-1.0</b> |
| <b>MTH1</b>    | Negative regulator of the glucose-sensing signal transduction pathway                                                                                                                                                      | <b>-1.5</b> |
| <b>RAD34</b>   | Protein involved in nucleotide excision repair (NER)                                                                                                                                                                       | <b>-1.8</b> |
| <b>ESC2</b>    | Sumo-like domain protein; prevents accumulation of toxic intermediates during replication-associated recombinational repair; roles in silencing, lifespan, chromatid cohesion and the intra-S-phase DNA damage checkpoint  | <b>-1.9</b> |
| <b>YDR391C</b> | Putative protein of unknown function; possibly involved in zinc homeostasis; Bdf1p-dependent transcription induced by salt stress                                                                                          | <b>-1.1</b> |
| <b>HEH2</b>    | Inner nuclear membrane (INM) protein                                                                                                                                                                                       | <b>-1.1</b> |
| <b>PRP3</b>    | Splicing factor; component of the U4/U6-U5 snRNP complex                                                                                                                                                                   | <b>-2.2</b> |
| <b>EMI2</b>    | Non-essential protein of unknown function implicated in sporulation and transcription regulation; required for transcriptional induction of the early meiotic-specific transcription factor IME1; required for sporulation | <b>-1.1</b> |
| <b>KRE28</b>   | Subunit of a kinetochore-microtubule binding complex; required for sister chromatid bi-orientation and kinetochore binding of SAC components                                                                               | <b>-2.4</b> |
| <b>FIT1</b>    | Mannoprotein that is incorporated into the cell wall                                                                                                                                                                       | <b>-2.0</b> |
| <b>IRC4</b>    | Protein of unknown function                                                                                                                                                                                                | <b>-1.3</b> |
| <b>RGH1</b>    | Protein of unknown function; involved in energy metabolism under respiratory conditions; protein abundance is increased upon intracellular iron depletion or in response to DNA replication stress                         | <b>-1.7</b> |
| <b>SPI1</b>    | GPI-anchored cell wall protein involved in weak acid resistance                                                                                                                                                            | <b>-1.1</b> |
| <b>YER158C</b> | Protein of unknown function; potentially phosphorylated by Cdc28p                                                                                                                                                          | <b>-0.8</b> |
| <b>SLO1</b>    | Protein interacting with Arl3p                                                                                                                                                                                             | <b>-1.2</b> |
| <b>IES1</b>    | Subunit of the INO80 chromatin remodeling complex; relocalizes to the cytosol in response to hypoxia                                                                                                                       | <b>-0.8</b> |
| <b>LAM5</b>    | Putative sterol transfer protein with a role in intracellular sterol transport, by similarity with Lam6p                                                                                                                   | <b>-0.9</b> |

|                |                                                                                                                                                                                                                                               |             |
|----------------|-----------------------------------------------------------------------------------------------------------------------------------------------------------------------------------------------------------------------------------------------|-------------|
| <b>COS4</b>    | Endosomal protein involved in turnover of plasma membrane proteins; predicted to have a role in the multivesicular body sorting pathway                                                                                                       | <b>-0.9</b> |
| <b>YFL065C</b> | Putative protein of unknown function; induced by treatment with 8-methoxypsoralen and UVA irradiation                                                                                                                                         | <b>-1.4</b> |
| <b>FAR7</b>    | Protein involved in recovery from pheromone-induced cell cycle arrest                                                                                                                                                                         | <b>-1.4</b> |
| <b>YFR016C</b> | Protein of unknown function                                                                                                                                                                                                                   | <b>-1.5</b> |
| <b>ERJ5</b>    | Type I membrane protein with a J domain; required to preserve the folding capacity of the endoplasmic reticulum; loss of the non-essential ERJ5 gene leads to a constitutively induced unfolded protein response                              | <b>-0.9</b> |
| <b>RIM8</b>    | Protein involved in proteolytic activation of Rim101p; part of response to alkaline pH                                                                                                                                                        | <b>-1.0</b> |
| <b>YGL081W</b> | Putative protein of unknown function; non-essential gene; interacts genetically with CHS5, a gene involved in chitin biosynthesis                                                                                                             | <b>-1.1</b> |
| <b>RRT6</b>    | Putative protein of unknown function; non-essential gene identified in a screen for mutants with increased levels of rDNA transcription                                                                                                       | <b>-1.1</b> |
| <b>NUT1</b>    | Component of the RNA polymerase II mediator complex; mediator is required for transcriptional activation and also has a role in basal transcription                                                                                           | <b>-1.0</b> |
| <b>VID30</b>   | Central component of GID Complex, involved in FBPase degradation; required for association of Vid vesicles and actin patches in vacuole import and degradation pathway; shifts the balance of nitrogen metabolism toward glutamate production | <b>-1.2</b> |
| <b>YGL262W</b> | Putative protein of unknown function                                                                                                                                                                                                          | <b>-1.1</b> |
| <b>STF2</b>    | Protein involved in resistance to desiccation stress; exhibits antioxidant properties, and its overexpression prevents ROS accumulation and apoptosis                                                                                         | <b>-1.1</b> |
| <b>SEC9</b>    | t-SNARE protein required for secretory vesicle-plasma membrane fusion                                                                                                                                                                         | <b>-1.7</b> |
| <b>MTL1</b>    | Putative plasma membrane sensor; involved in cell integrity signaling and stress response during glucose starvation and oxidative stress                                                                                                      | <b>-0.9</b> |
| <b>MCO32</b>   | Putative protein of unknown function                                                                                                                                                                                                          | <b>-1.6</b> |
| <b>YGR066C</b> | Putative protein of unknown function                                                                                                                                                                                                          | <b>-1.8</b> |
| <b>YGR130C</b> | Component of the eisosome with unknown function                                                                                                                                                                                               | <b>-1.6</b> |
| <b>ECL1</b>    | Protein of unknown function; overexpression increases oxygen consumption and respiratory activity while deletion results in reduced oxygen consumption under conditions of caloric restriction                                                | <b>-0.9</b> |
| <b>YHR022C</b> | Putative protein of unknown function; non-essential gene                                                                                                                                                                                      | <b>-1.4</b> |
| <b>NMD2</b>    | Protein involved in the nonsense-mediated mRNA decay (NMD) pathway                                                                                                                                                                            | <b>-1.6</b> |
| <b>RTC3</b>    | Protein of unknown function involved in RNA metabolism                                                                                                                                                                                        | <b>-1.2</b> |
| <b>YHR140W</b> | Putative integral membrane protein of unknown function                                                                                                                                                                                        | <b>-1.2</b> |
| <b>LIN1</b>    | Non-essential component of U5 snRNP                                                                                                                                                                                                           | <b>-2.6</b> |

|                |                                                                                                                                                                                                           |             |
|----------------|-----------------------------------------------------------------------------------------------------------------------------------------------------------------------------------------------------------|-------------|
| <b>KEL1</b>    | Protein required for proper cell fusion and cell morphology                                                                                                                                               | <b>-1.3</b> |
| <b>PEX18</b>   | Peroxin; peroxisomal protein involved in the import of proteins into the peroxisomal matrix                                                                                                               | <b>-1.3</b> |
| <b>VID28</b>   | GID Complex subunit, serves as adaptor for regulatory subunit Vid24p; vacuolar import and degradation                                                                                                     | <b>-0.9</b> |
| <b>YIL055C</b> | Putative protein of unknown function                                                                                                                                                                      | <b>-1.8</b> |
| <b>YRB2</b>    | Protein of unknown function; involved in nuclear processes of the Ran-GTPase cycle; involved in nuclear protein export; contains Ran Binding Domain and FxFG repeats                                      | <b>-1.2</b> |
| <b>PCI8</b>    | Possible shared subunit of Cop9 signalosome (CSN) and eIF3                                                                                                                                                | <b>-1.5</b> |
| <b>SPO22</b>   | Meiosis-specific protein essential for chromosome synapsis; involved in synaptonemal complex assembly and protein sumoylation                                                                             | <b>-1.1</b> |
| <b>YIL108W</b> | Putative metalloendopeptidase; forms cytoplasmic foci upon DNA replication stress                                                                                                                         | <b>-0.8</b> |
| <b>OM45</b>    | Mitochondrial outer membrane protein of unknown function                                                                                                                                                  | <b>-1.3</b> |
| <b>FLO11</b>   | GPI-anchored cell surface glycoprotein (flocculin); Protein involved in flocculation, coflocculation, cell adhesion during biofilm formation, and in pseudohyphal and invasive growth                     | <b>-1.5</b> |
| <b>INA22</b>   | F1F0 ATP synthase peripheral stalk assembly factor; mitochondrial inner membrane protein and subunit of the INA complex (INAC) with a role in assembly of mitochondrial F1F0 ATP synthase                 | <b>-1.2</b> |
| <b>MGA2</b>    | ER membrane protein involved in regulation of OLE1 transcription; inactive ER form dimerizes and one subunit is then activated by ubiquitin/proteasome-dependent processing followed by nuclear targeting | <b>-0.9</b> |
| <b>TPH3</b>    | Putative protein of unknown function                                                                                                                                                                      | <b>-1.1</b> |
| <b>PET130</b>  | Protein required for respiratory growth                                                                                                                                                                   | <b>-1.4</b> |
| <b>CHM7</b>    | Yeast homolog of human CHMP7, localizes to the endoplasmic reticulum                                                                                                                                      | <b>-1.8</b> |
| <b>NCA3</b>    | Protein involved in mitochondrion organization                                                                                                                                                            | <b>-1.3</b> |
| <b>MTC1</b>    | Protein of unknown function that may interact with ribosomes                                                                                                                                              | <b>-0.7</b> |
| <b>YJL132W</b> | Putative protein of unknown function                                                                                                                                                                      | <b>-1.0</b> |
| <b>YJL144W</b> | Cytoplasmic hydrophilin essential in desiccation-rehydration process; expression induced by osmotic stress, starvation and during stationary phase                                                        | <b>-1.2</b> |
| <b>FMP33</b>   | Putative protein of unknown function                                                                                                                                                                      | <b>-1.2</b> |
| <b>JJJ2</b>    | Protein of unknown function                                                                                                                                                                               | <b>-1.6</b> |
| <b>RCY1</b>    | F-box protein involved in recycling endocytosed proteins; involved in recycling plasma membrane proteins internalized by endocytosis                                                                      | <b>-1.0</b> |
| <b>LSO1</b>    | Protein with a potential role in response to iron deprivation                                                                                                                                             | <b>-1.0</b> |



|                |                                                                                                                                                                                                                                                                      |             |
|----------------|----------------------------------------------------------------------------------------------------------------------------------------------------------------------------------------------------------------------------------------------------------------------|-------------|
| <b>MHO1</b>    | Protein of unknown function                                                                                                                                                                                                                                          | <b>-1.1</b> |
| <b>MNN14</b>   | Putative protein of unknown function; non-essential gene                                                                                                                                                                                                             | <b>-0.9</b> |
| <b>BIR1</b>    | Subunit of chromosomal passenger complex (CPC); required for chromosome bi-orientation and for spindle assembly checkpoint activation upon reduced sister kinetochore tension; relative distribution to shortened microtubules increases upon DNA replication stress | <b>-1.5</b> |
| <b>SGM1</b>    | Protein of unknown function; required for wild-type growth rate on galactose and mannose                                                                                                                                                                             | <b>-2.3</b> |
| <b>YJR149W</b> | Putative protein of unknown function                                                                                                                                                                                                                                 | <b>-1.5</b> |
| <b>YJR154W</b> | Putative protein of unknown function                                                                                                                                                                                                                                 | <b>-1.1</b> |
| <b>DID4</b>    | Class E Vps protein of the ESCRT-III complex; required for sorting of integral membrane proteins into luminal vesicles of multivesicular bodies, and for delivery of newly synthesized vacuolar enzymes to the vacuole, involved in endocytosis                      | <b>-0.6</b> |
| <b>VPS24</b>   | One of four subunits of the ESCRT-III complex; forms an endosomal sorting complex required for transport III (ESCRT-III) subcomplex with Did4p; involved in the sorting of transmembrane proteins into the multivesicular body (MVB) pathway                         | <b>-0.9</b> |
| <b>BLI1</b>    | Subunit of the BLOC-1 complex involved in endosomal maturation                                                                                                                                                                                                       | <b>-1.1</b> |
| <b>STB6</b>    | Protein that binds Sin3p in a two-hybrid assay                                                                                                                                                                                                                       | <b>-1.4</b> |
| <b>RRP14</b>   | Essential protein, constituent of 66S pre-ribosomal particles; interacts with proteins involved in ribosomal biogenesis and cell polarity                                                                                                                            | <b>-2.3</b> |
| <b>YJU2</b>    | Essential protein required for pre-mRNA splicing                                                                                                                                                                                                                     | <b>-1.3</b> |
| <b>YKL107W</b> | Putative short-chain dehydrogenase/reductase                                                                                                                                                                                                                         | <b>-1.2</b> |
| <b>SBA1</b>    | Co-chaperone that binds and regulates Hsp90 family chaperones; involved in protein folding, positive regulation of telomere maintenance via telomerase, negative regulation of DNA binding, and regulation of telomerase activity                                    | <b>-0.4</b> |
| <b>RCI50</b>   | Putative protein of unknown function; not required for growth of cells lacking the mitochondrial genome; SWAT-GFP and mCherry fusion proteins localize to the mitochondria                                                                                           | <b>-1.1</b> |
| <b>COY1</b>    | Golgi membrane protein with similarity to mammalian CASP; genetic interactions with GOS1 (encoding a Golgi snare protein) suggest a role in Golgi function                                                                                                           | <b>-1.4</b> |
| <b>YKR011C</b> | Protein of unknown function; protein abundance increases in response to DNA replication stress                                                                                                                                                                       | <b>-1.0</b> |
| <b>YKR015C</b> | Putative protein of unknown function                                                                                                                                                                                                                                 | <b>-1.1</b> |
| <b>MIC60</b>   | Component of the MICOS complex; involved in mitochondrial cristae formation and the import of proteins into the mitochondrial intermembrane space                                                                                                                    | <b>-0.7</b> |
| <b>YKR023W</b> | Putative protein of unknown function; is detected in highly purified mitochondria in high-throughput studies                                                                                                                                                         | <b>-1.6</b> |
| <b>YKR041W</b> | Protein of unknown function; localizes to the mitotic spindle; its overexpression affects endocytic protein trafficking                                                                                                                                              | <b>-1.3</b> |

|                |                                                                                                                                                                                                                                                                    |             |
|----------------|--------------------------------------------------------------------------------------------------------------------------------------------------------------------------------------------------------------------------------------------------------------------|-------------|
| <b>THI73</b>   | Putative plasma membrane permease; proposed to be involved in carboxylic acid uptake and repressed by thiamine                                                                                                                                                     | <b>-1.9</b> |
| <b>SNF7</b>    | One of four subunits of the ESCRT-III complex; involved in ubiquitin-dependent protein catabolism via the multivesicular body sorting pathway, late endosome to vacuole transport, intraluminal vesicle formation, ATP export, and the cellular response to anoxia | <b>-1.0</b> |
| <b>YLR046C</b> | Putative membrane protein                                                                                                                                                                                                                                          | <b>-0.8</b> |
| <b>OSW2</b>    | Protein of unknown function reputedly involved in spore wall assembly                                                                                                                                                                                              | <b>-1.0</b> |
| <b>EMP46</b>   | Integral membrane component of ER-derived COPII-coated vesicles                                                                                                                                                                                                    | <b>-2.5</b> |
| <b>GIS3</b>    | Protein of unknown function                                                                                                                                                                                                                                        | <b>-1.3</b> |
| <b>AVL9</b>    | Conserved protein involved in exocytic transport from the Golgi                                                                                                                                                                                                    | <b>-1.5</b> |
| <b>YLR149C</b> | Protein of unknown function; non-essential gene; null mutation results in a decrease in plasma membrane electron transport; protein abundance increases in response to DNA replication stress                                                                      | <b>-1.1</b> |
| <b>YLR179C</b> | Protein of unknown function with similarity to Tfs1p                                                                                                                                                                                                               | <b>-0.7</b> |
| <b>YLR225C</b> | Putative protein of unknown function; non-essential gene                                                                                                                                                                                                           | <b>-1.0</b> |
| <b>CMG1</b>    | Putative protein of unknown function                                                                                                                                                                                                                               | <b>-2.0</b> |
| <b>IMH1</b>    | Protein involved in vesicular transport                                                                                                                                                                                                                            | <b>-1.5</b> |
| <b>ATG23</b>   | Peripheral membrane protein required for autophagy and CVT; involved in upregulation of macroautophagy, protein localization to pre-autophagosomal structure, late nucleophagy, cytoplasm-to-vacuole targeting (CVT) pathway                                       | <b>-1.5</b> |
| <b>YML003W</b> | Putative protein of unknown function                                                                                                                                                                                                                               | <b>-1.2</b> |
| <b>ITT1</b>    | Protein that modulates the efficiency of translation termination                                                                                                                                                                                                   | <b>-1.1</b> |
| <b>COG8</b>    | Component of the conserved oligomeric Golgi complex; involved in vesicle-mediated transport within the Golgi and CVT pathway                                                                                                                                       | <b>-1.0</b> |
| <b>MSC1</b>    | Protein of unknown function                                                                                                                                                                                                                                        | <b>-1.3</b> |
| <b>YML131W</b> | Protein of unknown function                                                                                                                                                                                                                                        | <b>-1.4</b> |
| <b>BUD22</b>   | Protein required for rRNA maturation and ribosomal subunit biogenesis                                                                                                                                                                                              | <b>-1.2</b> |
| <b>TAP42</b>   | Essential protein involved in the TOR signaling pathway                                                                                                                                                                                                            | <b>-1.4</b> |
| <b>EIS1</b>    | Component of the eisosome required for proper eisosome assembly; protein increases in abundance and relocates from plasma membrane to cytoplasm upon DNA replication stress                                                                                        | <b>-1.4</b> |
| <b>KAR5</b>    | Protein required for nuclear membrane fusion during karyogamy                                                                                                                                                                                                      | <b>-1.0</b> |
| <b>SOV1</b>    | Mitochondrial protein of unknown function                                                                                                                                                                                                                          | <b>-1.1</b> |
| <b>YMR111C</b> | Protein of unknown function                                                                                                                                                                                                                                        | <b>-1.0</b> |

|                  |                                                                                                                                                                                                                                                                                             |             |
|------------------|---------------------------------------------------------------------------------------------------------------------------------------------------------------------------------------------------------------------------------------------------------------------------------------------|-------------|
| <b>SHH3</b>      | Putative mitochondrial inner membrane protein of unknown function                                                                                                                                                                                                                           | <b>-1.0</b> |
| <b>YMR122W-A</b> | Protein of unknown function                                                                                                                                                                                                                                                                 | <b>-0.5</b> |
| <b>YMR158C-A</b> | Putative protein of unknown function                                                                                                                                                                                                                                                        | <b>-2.0</b> |
| <b>YMR181C</b>   | Protein of unknown function; non-essential gene                                                                                                                                                                                                                                             | <b>-0.8</b> |
| <b>MIN3</b>      | Putative protein of unknown function                                                                                                                                                                                                                                                        | <b>-1.3</b> |
| <b>VTI1</b>      | Protein involved in cis-Golgi membrane traffic; SNAP receptor subunit of SNARE complex that mediates membrane fusion; integral component of Golgi membrane involved in vesicle-mediated transport and fusion, Golgi to vacuole transport, non-autophagic vacuole fusion, and macroautophagy | <b>-0.7</b> |
| <b>YMR253C</b>   | Putative protein of unknown function; non-essential gene                                                                                                                                                                                                                                    | <b>-1.2</b> |
| <b>VAC7</b>      | Integral vacuolar membrane protein                                                                                                                                                                                                                                                          | <b>-1.2</b> |
| <b>YNL115C</b>   | Putative protein of unknown function                                                                                                                                                                                                                                                        | <b>-0.9</b> |
| <b>FYV6</b>      | Protein of unknown function; required for survival upon exposure to K1 killer toxin; proposed to regulate double-strand break repair via non-homologous end-joining                                                                                                                         | <b>-0.9</b> |
| <b>EAF7</b>      | Subunit of the NuA4 histone acetyltransferase complex                                                                                                                                                                                                                                       | <b>-1.5</b> |
| <b>YNL144C</b>   | Putative protein of unknown function                                                                                                                                                                                                                                                        | <b>-1.3</b> |
| <b>YGP1</b>      | Cell wall-related secretory glycoprotein; may be involved in adaptation prior to stationary phase entry                                                                                                                                                                                     | <b>-2.1</b> |
| <b>KAR1</b>      | Protein involved in karyogamy during mating and spindle pole body duplication during mitosis                                                                                                                                                                                                | <b>-1.9</b> |
| <b>SQS1</b>      | Protein that stimulates the ATPase and helicase activities of Prp43p                                                                                                                                                                                                                        | <b>-1.2</b> |
| <b>PDR16</b>     | Phosphatidylinositol transfer protein (PITP); controls levels of various lipids, may regulate lipid synthesis                                                                                                                                                                               | <b>-0.7</b> |
| <b>YTP1</b>      | Probable type-III integral membrane protein of unknown function                                                                                                                                                                                                                             | <b>-1.0</b> |
| <b>KRI1</b>      | Essential nucleolar protein required for 40S ribosome biogenesis                                                                                                                                                                                                                            | <b>-1.3</b> |
| <b>EGO4</b>      | Protein of unknown function                                                                                                                                                                                                                                                                 | <b>-3.1</b> |
| <b>YNR068C</b>   | Putative protein of unknown function                                                                                                                                                                                                                                                        | <b>-1.3</b> |
| <b>TLG2</b>      | Syntaxin-like t-SNARE; required along with VPS45 for an early step of the constitutive CVT pathway; interactions with Vps45 prevents Tlg2p degradation, and facilitates t-SNARE complex formation                                                                                           | <b>-1.6</b> |
| <b>DDR2</b>      | Multi-stress response protein; expression is activated by a variety of xenobiotic agents and environmental or physiological stresses                                                                                                                                                        | <b>-1.0</b> |
| <b>IZH4</b>      | Membrane protein involved in zinc ion homeostasis; possible role in sterol metabolism; protein increases in abundance and relocalizes from nucleus to ER upon DNA replication stress                                                                                                        | <b>-1.0</b> |

|                |                                                                                                                                                                                                                                     |             |
|----------------|-------------------------------------------------------------------------------------------------------------------------------------------------------------------------------------------------------------------------------------|-------------|
| <b>PEP12</b>   | Target membrane receptor (t-SNARE); for vesicular intermediates traveling between the Golgi apparatus and the vacuole; controls entry of biosynthetic, endocytic, and retrograde traffic into the prevacuolar compartment; syntaxin | <b>-0.9</b> |
| <b>TMC1</b>    | AN1-type zinc finger protein, effector of proteotoxic stress response                                                                                                                                                               | <b>-0.6</b> |
| <b>SLD7</b>    | Protein with a role in chromosomal DNA replication                                                                                                                                                                                  | <b>-1.5</b> |
| <b>RTS2</b>    | Basic zinc-finger protein                                                                                                                                                                                                           | <b>-1.5</b> |
| <b>YOR097C</b> | Putative protein of unknown function; non-essential gene                                                                                                                                                                            | <b>-1.1</b> |
| <b>SIA1</b>    | Protein of unassigned function; involved in activation of the Pma1p plasma membrane H <sup>+</sup> -ATPase by glucose                                                                                                               | <b>-1.1</b> |
| <b>SLK19</b>   | Kinetochores-associated protein; required for chromosome segregation and kinetochores clustering; required for normal segregation of chromosomes in meiosis and mitosis                                                             | <b>-2.2</b> |
| <b>RRP36</b>   | Component of 90S preribosomes                                                                                                                                                                                                       | <b>-1.1</b> |
| <b>SNU66</b>   | Component of the U4/U6.U5 snRNP complex                                                                                                                                                                                             | <b>-1.0</b> |
| <b>FIT2</b>    | Mannoprotein that is incorporated into the cell wall; involved in the retention of siderophore-iron in the cell wall                                                                                                                | <b>-0.6</b> |
| <b>FIT3</b>    | Mannoprotein that is incorporated into the cell wall; involved in the retention of siderophore-iron in the cell wall                                                                                                                | <b>-1.0</b> |
| <b>YOR389W</b> | Putative protein of unknown function; expression regulated by copper levels                                                                                                                                                         | <b>-1.5</b> |
| <b>ATG29</b>   | Autophagy-specific protein; involved in macroautophagy, late nucleophagy, mitochondrion degradation and piecemeal microautophagy of nucleus; required for recruiting other ATG proteins to the pre-autophagosomal structure (PAS)   | <b>-1.3</b> |
| <b>UIP4</b>    | Protein that interacts with Ulp1p                                                                                                                                                                                                   | <b>-1.8</b> |
| <b>YPL191C</b> | Protein of unknown function                                                                                                                                                                                                         | <b>-1.2</b> |
| <b>APL5</b>    | Delta adaptin-like subunit of the clathrin associated protein complex                                                                                                                                                               | <b>-1.1</b> |
| <b>YPL247C</b> | Putative protein of unknown function                                                                                                                                                                                                | <b>-1.1</b> |
| <b>YPL277C</b> | Putative protein of unknown function; gene expression regulated by copper levels                                                                                                                                                    | <b>-1.5</b> |
| <b>YPL278C</b> | Putative protein of unknown function; gene expression regulated by copper levels                                                                                                                                                    | <b>-1.1</b> |
| <b>THP3</b>    | Protein that may have a role in transcription elongation; possibly involved in splicing based on pre-mRNA accumulation defect for many intron-containing genes                                                                      | <b>-1.1</b> |
| <b>YPR127W</b> | Putative pyridoxine 4-dehydrogenase                                                                                                                                                                                                 | <b>-0.9</b> |

Data obtained from Saccharomyces Genome Database (<https://www.yeastgenome.org>)

### Supplementary Figure S1

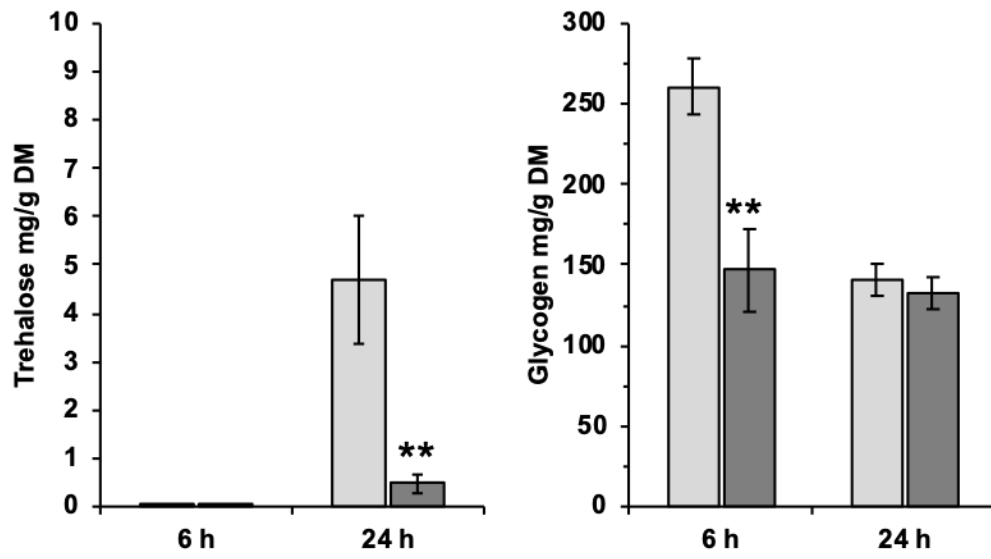

**Figure S1.** Intracellular trehalose and glycogen concentration after 6 and 24 h of fermentation in the presence of 0% (light grey) and 40% (dark grey) IS (w/w). Significant differences: \*\*  $P < 0.01$
